# Supplementary material
Source: PubMed Central journal article supplement (PMC4388599)

**Fig. 1A**

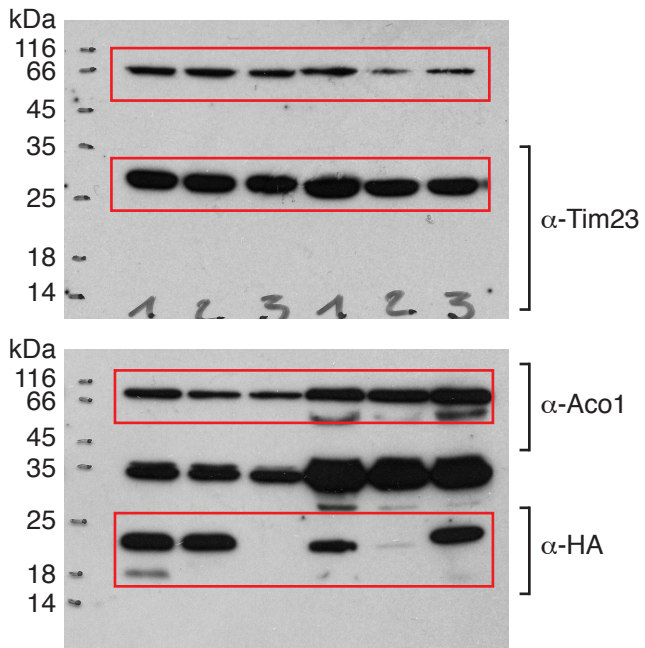

**Fig. 1B**

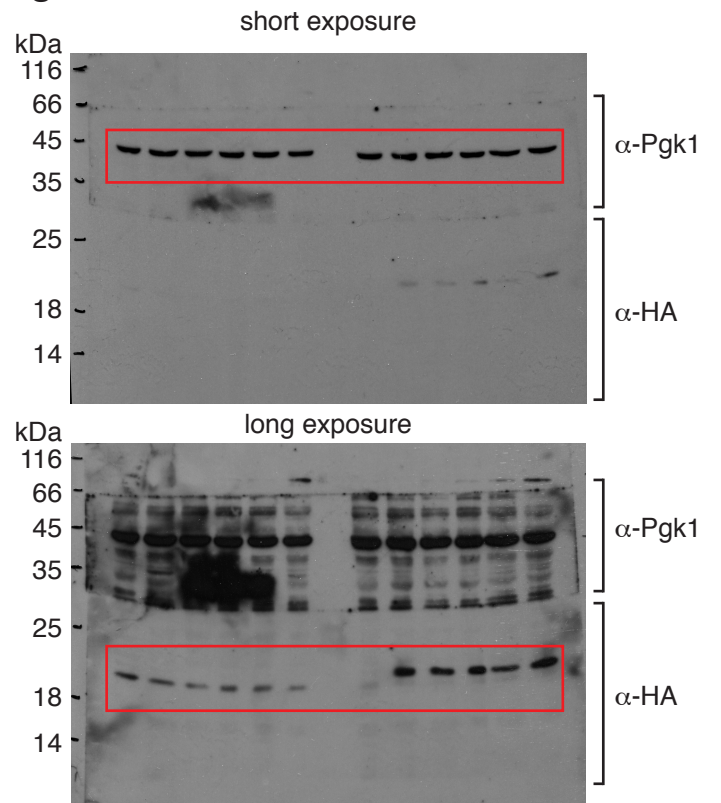

Supplement: embj0034-0911-sd3.pdf [file embj0034-0911-sd3.pdf]

**Fig. 2B**

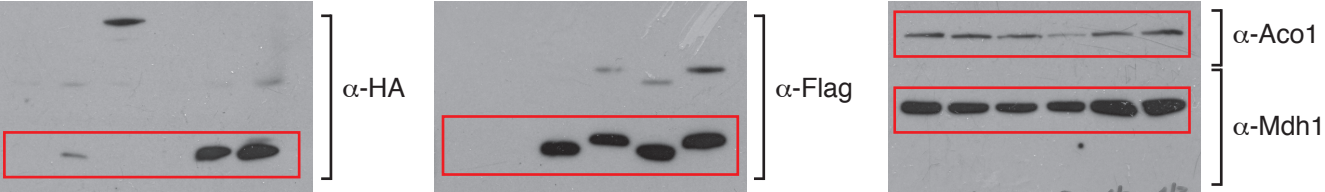

**Fig. 2D**

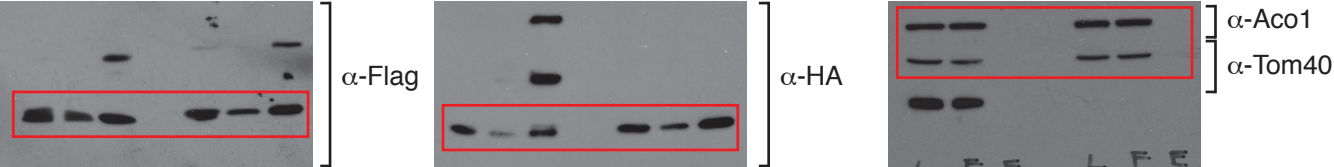

**Fig. 2E/F**

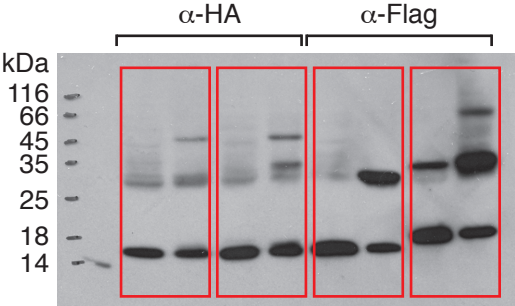

Supplement: embj0034-0911-sd4.pdf [file embj0034-0911-sd4.pdf]

Fig. 3A

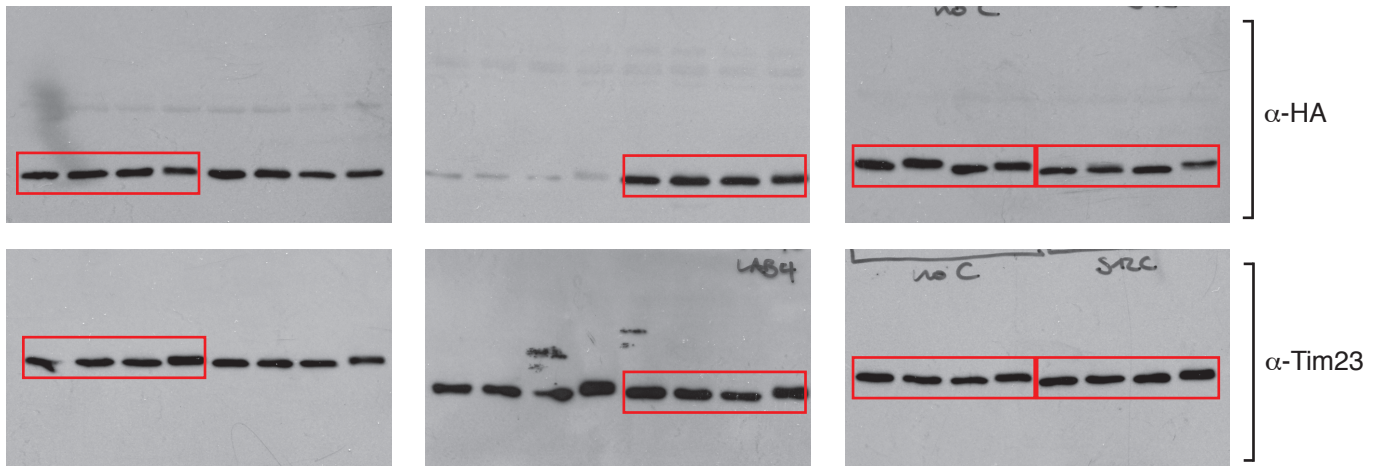

Fig. 3B

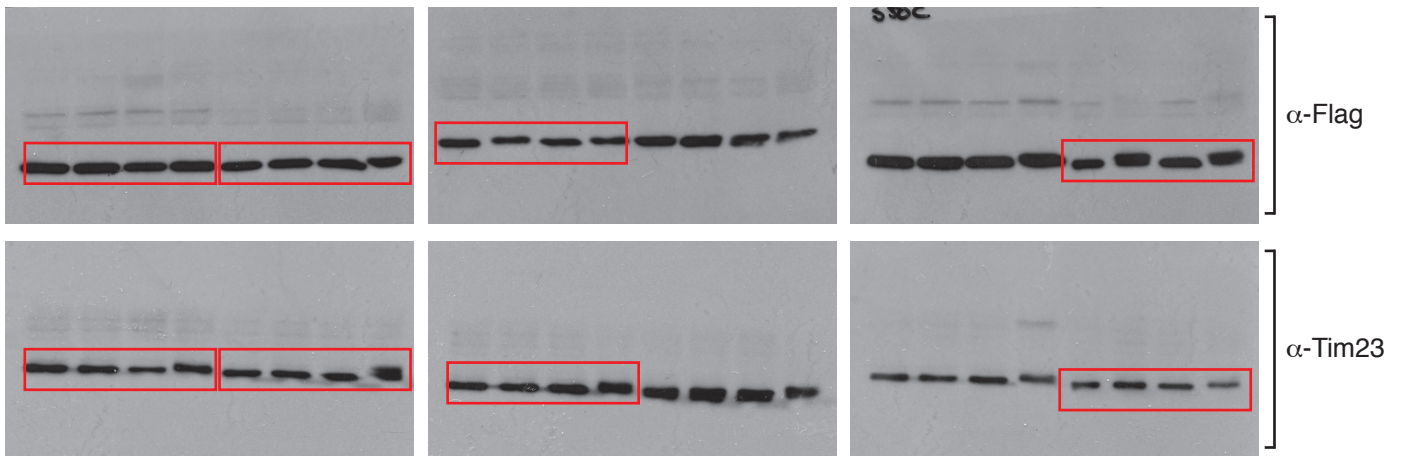

Fig. 3C

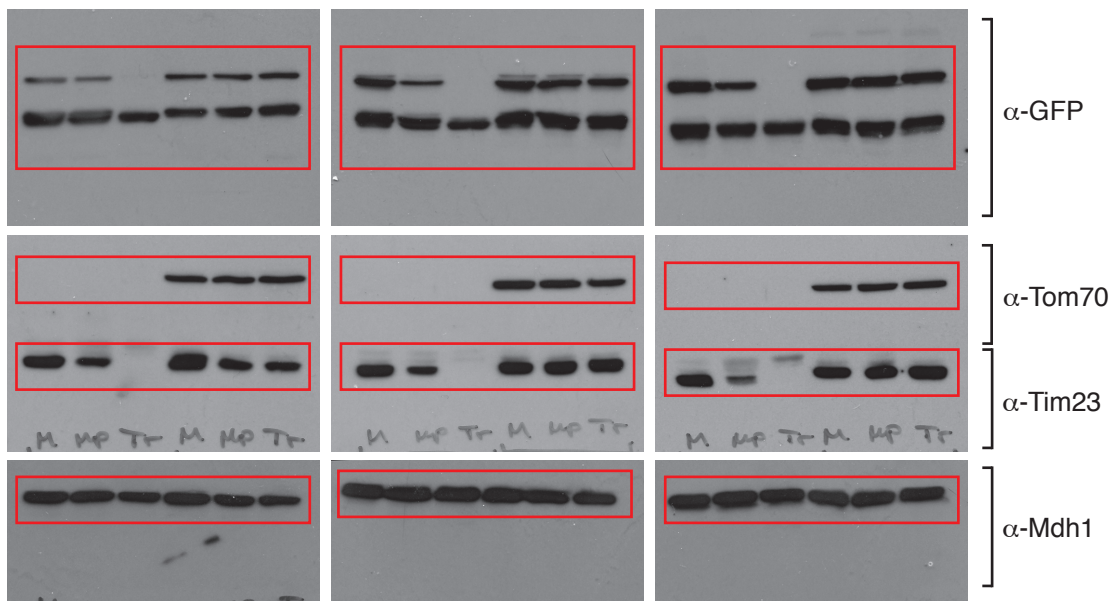

Supplement: embj0034-0911-sd5.pdf [file embj0034-0911-sd5.pdf]

**Fig. 5B**

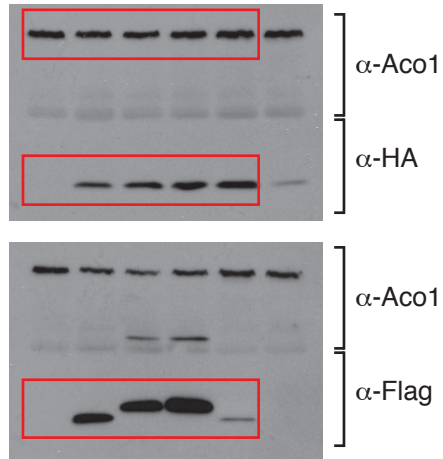

Supplement: embj0034-0911-sd6.pdf [file embj0034-0911-sd6.pdf]
